# Supplementary material
Source: PubMed Central journal article supplement (PMC10213294)
Supplement: mmc1.pdf [file mmc1.pdf]

**Cell Reports, Volume 42**

**Supplemental information**

**Structural changes in the SARS-CoV-2 spike**

**E406W mutant escaping a clinical**

**monoclonal antibody cocktail**

**Amin Addetia, Young-Jun Park, Tyler Starr, Allison J. Greaney, Kaitlin R. Sprouse, John E. Bowen, Sasha W. Tiles, Wesley C. Van Voorhis, Jesse D. Bloom, Davide Corti, Alexandra C. Walls, and David Veeler**

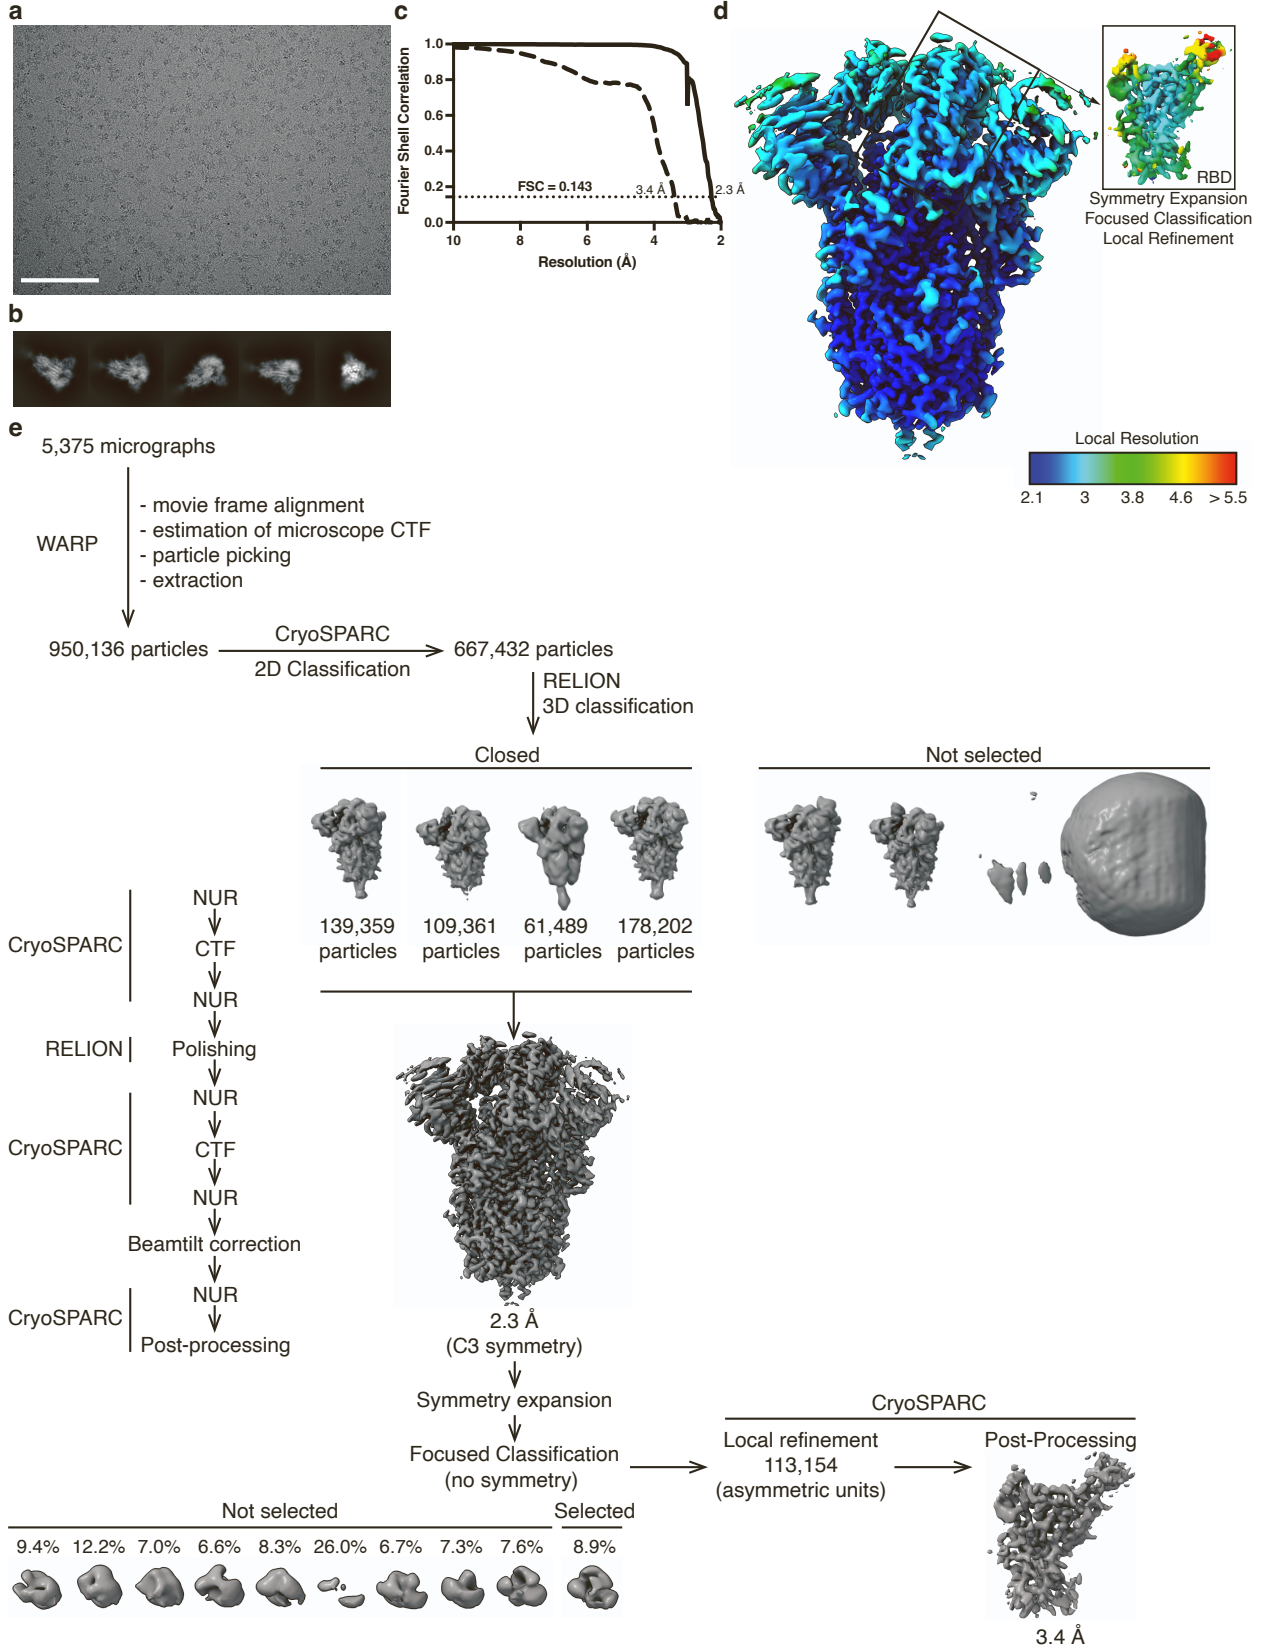

**Figure S1. cryo-EM processing and validation for the SARS-CoV-2 E406W spike dataset;** related to Figure 1 and STAR Methods. **a-b**, Representative electron micrograph (a) and 2D class averages (b) obtained for the SARS-CoV-2 E406W spike ectodomain. Scale bar: 100 nm. (c) Gold-standard fourier shell correlation curves for the closed E406W S trimer (solid line) and locally refined E406W RBD (dashed line). **d**, Local resolution calculated using CryoSPARC for the E406W S ectodomain trimer (left, unsharpened map) and the locally refined RBD (right, sharpened map). **e**, cryo-EM processing workflow.

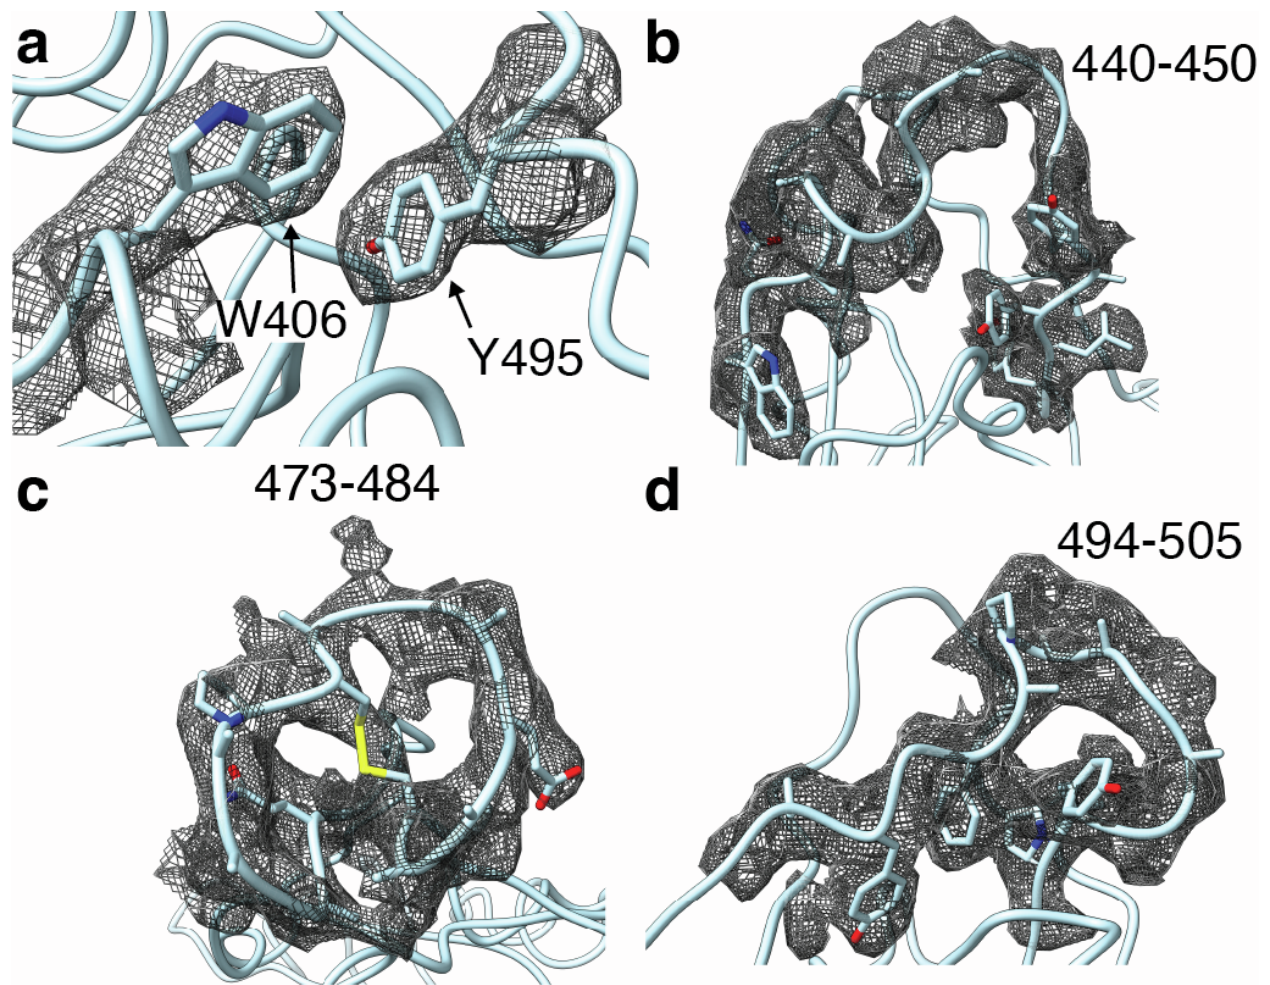

**Figure S2. Support for the structural rearrangements in the W406 RBD with the locally refined cryo-EM map;** related to Figure 1. Cryo-EM map, represented as a black mesh, obtained from local refinement of the RBD and the W406 RBD model compared to show the areas in which the W406 RBD diverges most significantly from the E406 RBD, including (a) the Y495 sidechain, (b) residues 440-450, (c) residues 473-484, and (d) residues 494-505.

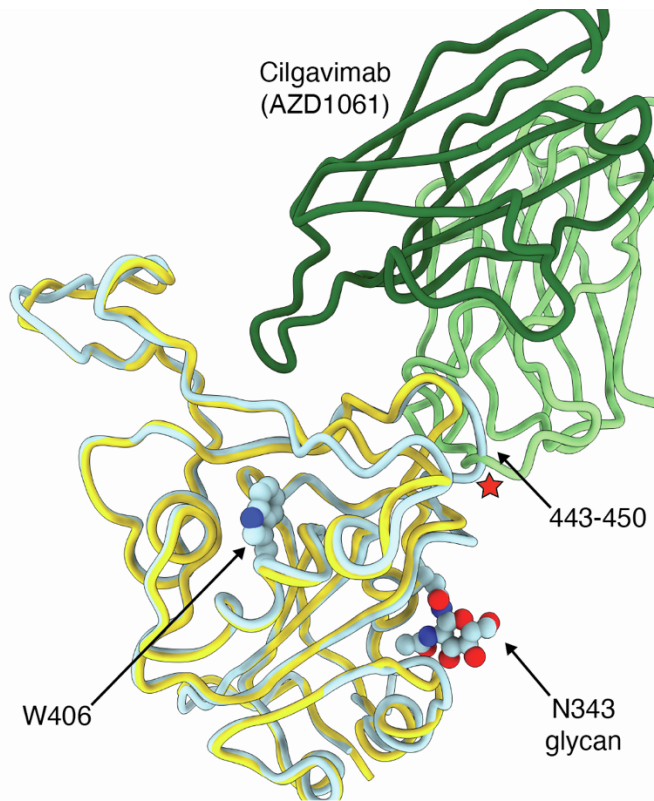

**Figure S3. Repositioning of residues 443-450 in the W406 RBD interferes sterically with cilgavimab binding;** related to Figure 1. Structural superimposition of the cilgavimab (AZD1061)-bound Wuhan-Hu-1 RBD (E406, gold, PBD 7L7E) and the W406 RBD (light blue). Key reorganized regions are labeled and the steric clash is indicated by a red star.

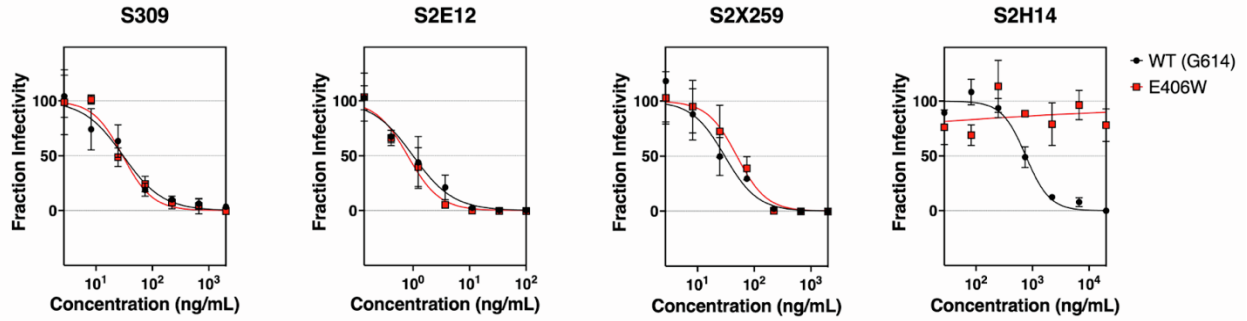

**Figure S4;** related to Table 1 and Figure 3. Neutralization curves for E406W/G614, shown in red, or wildtype (G164), shown in black, pseudotyped VSV using four monoclonal antibodies targeting the SARS-CoV-2 RBD. Neutralization assays were performed in triplicate and replicated twice with two batches of pseudovirus.

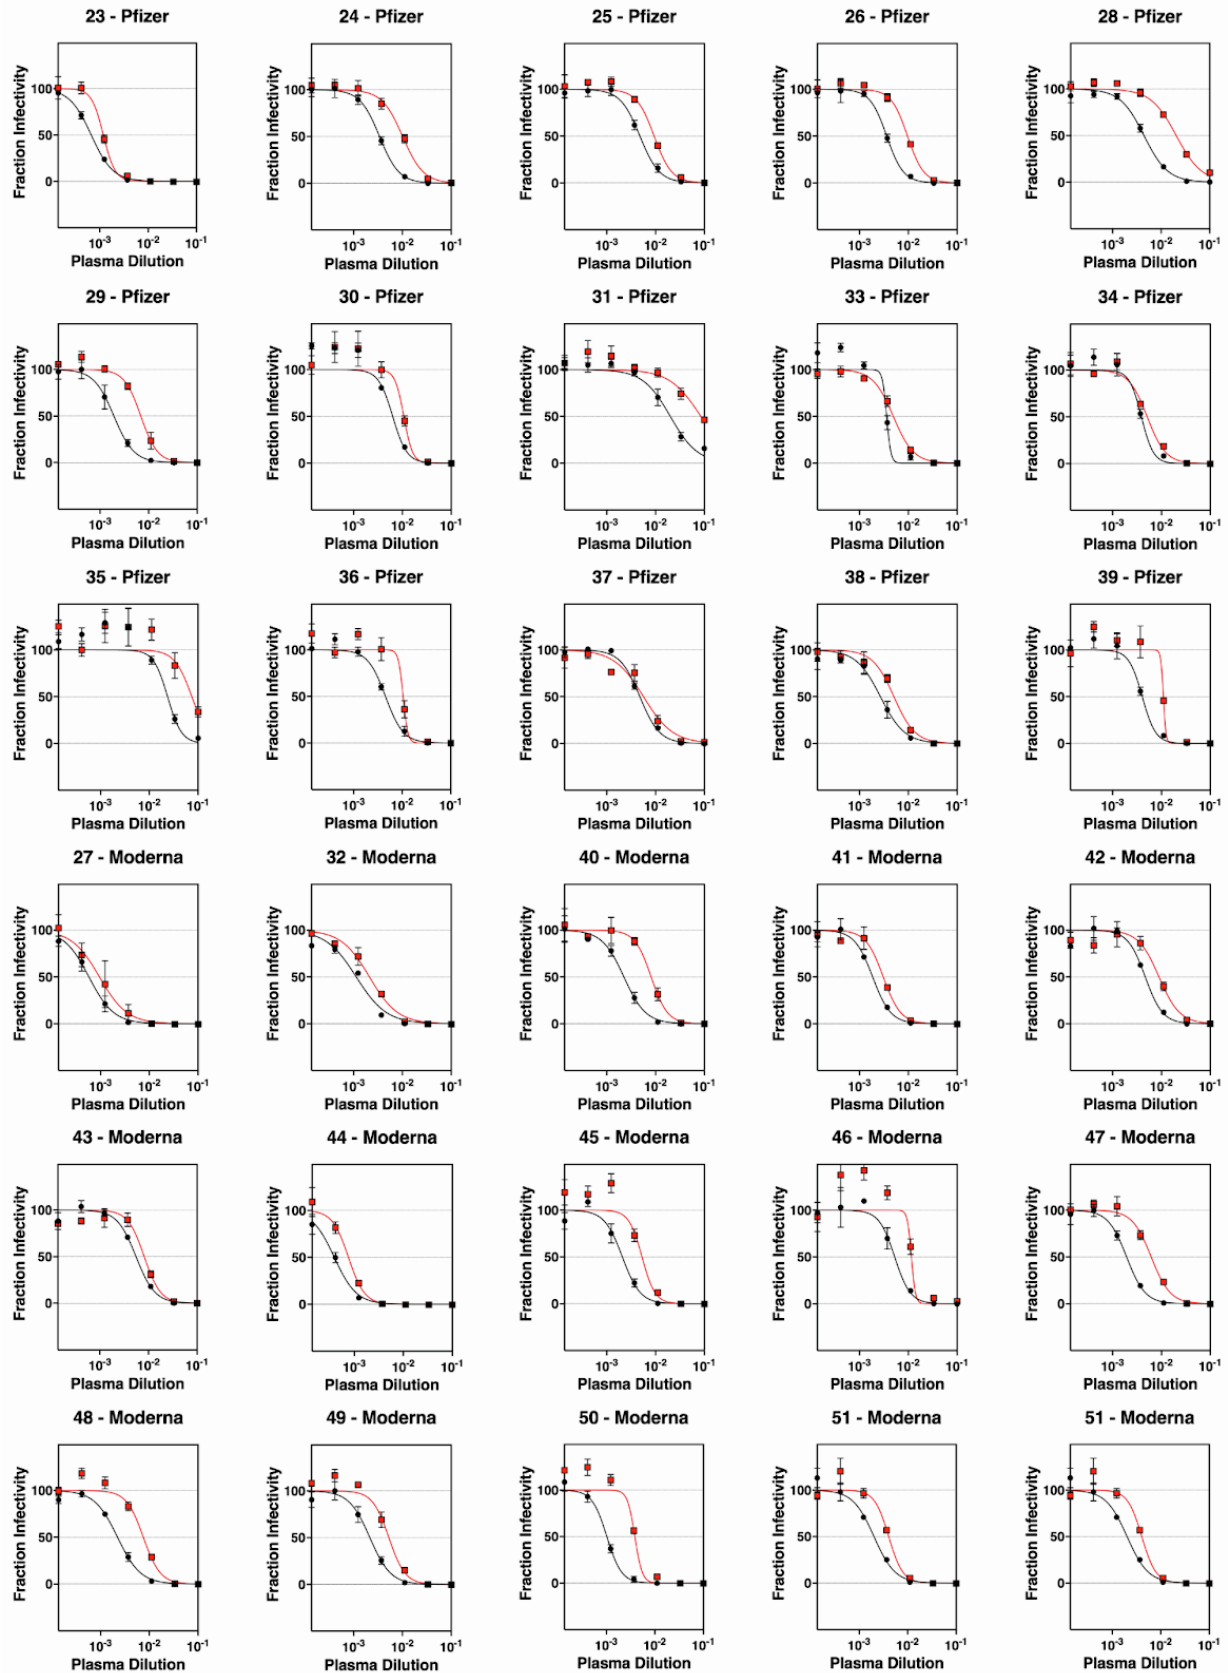

**Figure S5;** related to Figure 3. Neutralization curves against E406W/G614 S, shown in

red, or wildtype (G614) S, shown in black, pseudotyped VSV for 30 sera samples collected from individuals vaccinated with either Pfizer BNT162b2 or Moderna mRNA-1273 COVID-19 vaccines. Neutralization assays were performed in triplicate and repeated at least twice with at least two distinct batches of pseudovirus.



**Table S1.** Cryo-EM data collection, refinement and validation statistics; related to Figure 1.

|                                        | SARS-CoV-2 S E406W Ectodomain<br>(EMDB-26056)<br>(PDB 7TPI) | SARS-CoV-2 S E406W RBD<br>(local refinement)<br>(EMDB-26058)<br>(PDB 7TPK) |
|----------------------------------------|-------------------------------------------------------------|----------------------------------------------------------------------------|
| Data collection and processing         |                                                             |                                                                            |
| Magnification                          | 105,000                                                     | 105,000                                                                    |
| Voltage (kV)                           | 300                                                         | 300                                                                        |
| Electron exposure (e-/Å <sup>2</sup> ) | 63                                                          | 63                                                                         |
| Defocus range (µm)                     | - 0.1 to -2.6                                               | -0.1 to -2.6                                                               |
| Pixel size (Å)                         | 0.843                                                       | 0.843                                                                      |
| Symmetry imposed                       | C3                                                          | C1                                                                         |
| Initial particle images (no.)          | 950,136                                                     | 1,281,585                                                                  |
| Final particle images (no.)            | 427,195                                                     | 113,154                                                                    |
| Map resolution (Å)                     | 2.3                                                         | 3.4                                                                        |
| FSC threshold                          | 0.143                                                       | 0.143                                                                      |
| Map resolution range (Å)               | 2.2-8.9                                                     | 2.8-9.1                                                                    |
| Refinement                             |                                                             |                                                                            |
| Initial model used (PDB code)          | 7LXY                                                        | 6M0J                                                                       |

|                                                  |        |       |
|--------------------------------------------------|--------|-------|
| Model resolution (Å)                             | 2.3    | 3.4   |
| FSC threshold                                    | 0.143  | 0.143 |
| Map sharpening <i>B</i> factor (Å <sup>2</sup> ) | -71    | -104  |
| Model composition                                |        |       |
| Non-hydrogen atoms                               | 21,168 | 1,446 |
| Protein residues                                 | 2,862  | 194   |
| Ligands                                          | 54     | 1     |
| <i>B</i> factors (Å <sup>2</sup> )               |        |       |
| Protein                                          | 38.08  | 26.84 |
| Ligand                                           | 21.98  | 23.50 |
| R.m.s. deviations                                |        |       |
| Bond lengths (Å)                                 | 0.012  | 0.012 |
| Bond angles (°)                                  | 1.434  | 1.867 |
| Validation                                       |        |       |
| MolProbity score                                 | 1.01   | 1.02  |
| Clashscore                                       | 2.21   | 0.37  |
| Poor rotamers                                    | 0.49   | 0     |
| (%)                                              |        |       |
| Ramachandran plot                                |        |       |
| Favored (%)                                      | 97.95  | 94.27 |
| Allowed (%)                                      | 2.05   | 5.21  |
| Disallowed (%)                                   | 0      | 0.52  |

---

**Table S2.** Binding kinetics of the RBD to human ACE2 as measured by biolayer interferometry. Values are presented as mean  $\pm$  standard error; related to Figure 2.

|              | <b>K<sub>d</sub> (nM)</b> | <b>k<sub>on</sub> (M<sup>-1</sup>s<sup>-1</sup>)</b> | <b>k<sub>off</sub> (s<sup>-1</sup>)</b> |
|--------------|---------------------------|------------------------------------------------------|-----------------------------------------|
| <b>WT</b>    | 93.9 $\pm$ 3.3            | 1.4 $\times$ 10 <sup>5</sup>                         | 1.2 $\times$ 10 <sup>-2</sup>           |
| <b>Alpha</b> | 10.9 $\pm$ 0.9            | 2.3 $\times$ 10 <sup>5</sup>                         | 2.5 $\times$ 10 <sup>-3</sup>           |
| <b>E406W</b> | 1,335 $\pm$ 195           | 7.6 $\times$ 10 <sup>4</sup>                         | 1.0 $\times$ 10 <sup>-1</sup>           |

**Table S3.** Demographic information for vaccine-elicited sera donors; related to Figure 3.

| <b>Study ID</b> | <b>Age</b> | <b>Vaccine Type</b> | <b>Days after second vaccination</b> | <b>Sex</b> | <b>Race</b>      | <b>Ethnicity</b>       |
|-----------------|------------|---------------------|--------------------------------------|------------|------------------|------------------------|
| 23              | 60         | Pfizer              | 11                                   | M          | White            | Not Hispanic or Latino |
| 24              | 65         | Pfizer              | 10                                   | M          | White            | Not Hispanic or Latino |
| 25              | 55         | Pfizer              | 18                                   | M          | White            | Not Hispanic or Latino |
| 26              | 42         | Pfizer              | 9                                    | F          | White            | Not Hispanic or Latino |
| 27              | 66         | Moderna             | 8                                    | F          | White            | Not Hispanic or Latino |
| 28              | 63         | Pfizer              | 10                                   | M          | White            | Not Hispanic or Latino |
| 29              | 27         | Pfizer              | 8                                    | F          | White            | Not Hispanic or Latino |
| 30              | 38         | Pfizer              | 8                                    | F          | Asian            | Not Hispanic or Latino |
| 31              | 37         | Pfizer              | 21                                   | F          | Black            | Not Hispanic or Latino |
| 32              | 36         | Moderna             | 7                                    | M          | White            | Not Hispanic or Latino |
| 33              | 62         | Pfizer              | 15                                   | M          | Pacific Islander | Not Hispanic or Latino |
| 34              | 54         | Pfizer              | 14                                   | F          | White            | Not Hispanic or Latino |
| 35              | 60         | Pfizer              | 14                                   | F          | White            | Not Hispanic or Latino |
| 36              | 32         | Pfizer              | 13                                   | F          | White            | Not Hispanic or Latino |
| 37              | 52         | Pfizer              | 11                                   | M          | White            | Not Hispanic or Latino |
| 38              | 61         | Pfizer              | 9                                    | M          | White            | Not Hispanic or Latino |
| 39              | 32         | Pfizer              | 22                                   | F          | White            | Not Hispanic or Latino |
| 40              | 40         | Moderna             | 20                                   | M          | White            | Not Hispanic or Latino |
| 41              | 64         | Moderna             | 16                                   | M          | White            | Not Hispanic or Latino |
| 42              | 34         | Moderna             | 23                                   | F          | Asian            | Not Hispanic or Latino |

|    |    |         |    |   |                 |                        |
|----|----|---------|----|---|-----------------|------------------------|
| 43 | 22 | Moderna | 20 | F | White           | Not Hispanic or Latino |
| 44 | 24 | Moderna | 18 | F | White           | Not Hispanic or Latino |
| 45 | 35 | Moderna | 20 | M | White           | Not Hispanic or Latino |
| 46 | 40 | Moderna | 24 | M | White           | Not Hispanic or Latino |
| 47 | 55 | Moderna | 20 | M | White           | Not Hispanic or Latino |
| 48 | 25 | Moderna | 22 | M | White and Asian | Not Hispanic or Latino |
| 49 | 26 | Moderna | 18 | F | White           | Not Hispanic or Latino |
| 50 | 36 | Moderna | 27 | F | Asian           | Not Hispanic or Latino |
| 51 | 53 | Moderna | 20 | F | White           | Not Hispanic or Latino |
| 52 | 47 | Moderna | 21 | M | White           | Not Hispanic or Latino |
